# Supplementary material for: Genome-wide analysis of alternative splicing in Volvox carteri
Source: PubMed Central journal article supplement (PMC4378016; doi:10.1186/1471-2164-15-1117), 2014-12-16
Supplement: 12864_2014_6874_MOESM1_ESM.pdf [file 12864_2014_6874_MOESM1_ESM.pdf]

# Supplemental Material for Genome-wide analysis of alternative splicing in *Volvox carteri*

## Table of Contents

|                                                                                                                                                                                                 |    |
|-------------------------------------------------------------------------------------------------------------------------------------------------------------------------------------------------|----|
| Supplemental Figures .....                                                                                                                                                                      | 2  |
| Figure S1: Comparison protein isoforms encoded by <i>clpr2</i> .....                                                                                                                            | 3  |
| Figure S2: Comparison protein isoforms encoded by <i>efg8</i> .....                                                                                                                             | 4  |
| Figure S3: Comparison protein isoforms encoded by <i>hyd2</i> .....                                                                                                                             | 5  |
| Figure S4: Comparison protein isoforms encoded by <i>lgs2</i> .....                                                                                                                             | 6  |
| Figure S5: Comparison protein isoforms encoded by <i>mgmt</i> .....                                                                                                                             | 7  |
| Figure S6: Comparison protein isoforms encoded by <i>nrnp1</i> .....                                                                                                                            | 8  |
| Figure S7: Comparison protein isoforms encoded by <i>selEFf</i> .....                                                                                                                           | 9  |
| Figure S8: Comparison protein isoforms encoded by <i>cyn23</i> .....                                                                                                                            | 10 |
| Figure S9: Comparison protein isoforms encoded by <i>oee1</i> .....                                                                                                                             | 11 |
| Figure S10: Comparison protein isoforms encoded by <i>ppi1</i> .....                                                                                                                            | 12 |
| Figure S11: cDNA alignment of <i>cyn23</i> splice variants.....                                                                                                                                 | 13 |
| Figure S12: Relationship between estimated alternative splicing (AS) rate and EST coverage in<br><i>Arabidopsis thaliana</i> , <i>Volvox carteri</i> and <i>Chlamydomonas reinhardtii</i> ..... | 14 |
| Supplemental Tables.....                                                                                                                                                                        | 15 |
| Table S1: Genome statistics of <i>Volvox</i> and other species .....                                                                                                                            | 15 |
| Table S2: List of samples genes for experimental verification .....                                                                                                                             | 16 |
| Table S3: Names as sequences of oligonucleotide primers.....                                                                                                                                    | 17 |
| Table S4: Alternative splicing status of orthologous genes between <i>Volvox</i> and its close relative<br><i>Chlamydomonas</i> .....                                                           | 18 |
| Supplemental References.....                                                                                                                                                                    | 22 |

## Supplemental Figures

The Supplemental Figures S1 to S10 show protein sequence alignments (part A) and schematic representations (part B) of alternative splice variants. The deduced amino acid sequences were aligned and coloured using GeneDoc 2.6 [3]. The upper sequence represents the amino acid sequence of the first alternative splice variant (V1) while the lower sequence represents the amino acid sequence of the second alternative splice variant (V2). Identical amino acids are shown by white letters on black background. The amino acids, for which similarity was conserved at more than 80%, are shown by white letters on grey background. The positions of the introns are marked by red arrowheads. The numbers indicate the amino acid position in (A). The scale bar indicates the length in amino acid residues in (B).

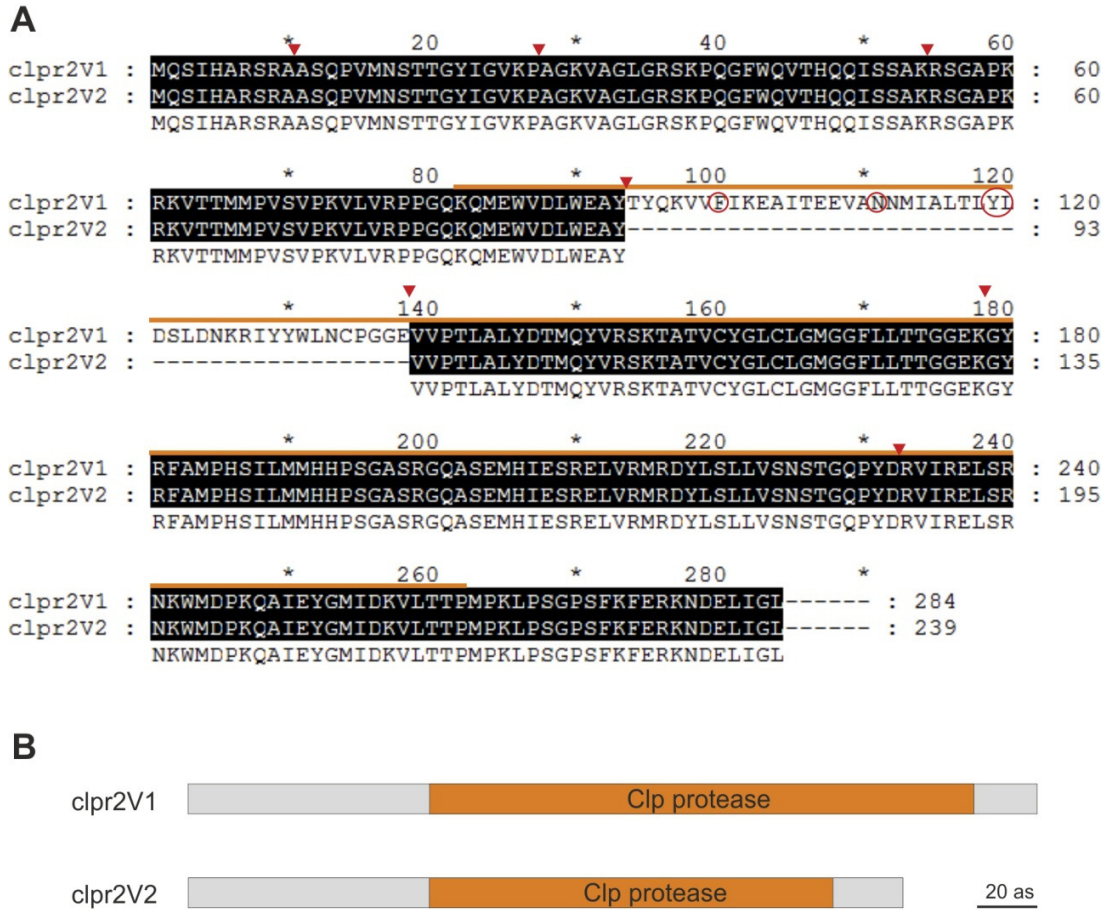

**Figure S1: Comparison protein isoforms encoded by *clpr2***

Protein sequence alignment (A) and schematic representation (B) of the deduced amino acid sequences of two alternative splice variants (clpr2V1 and clpr2V2) of *clpr2*. The clp protease domain of clpr2V1, which is 181 amino acid residues in length, is shortened to 136 amino acid residues in clpr2V2. The conserved residues F100, N111, Y119 and L120, which are involved in  $\alpha/\beta$ -type fold of the protein [6], are highlighted by the red circles. Thick orange line and orange box indicate clp protease domain in (A) and (B), respectively.

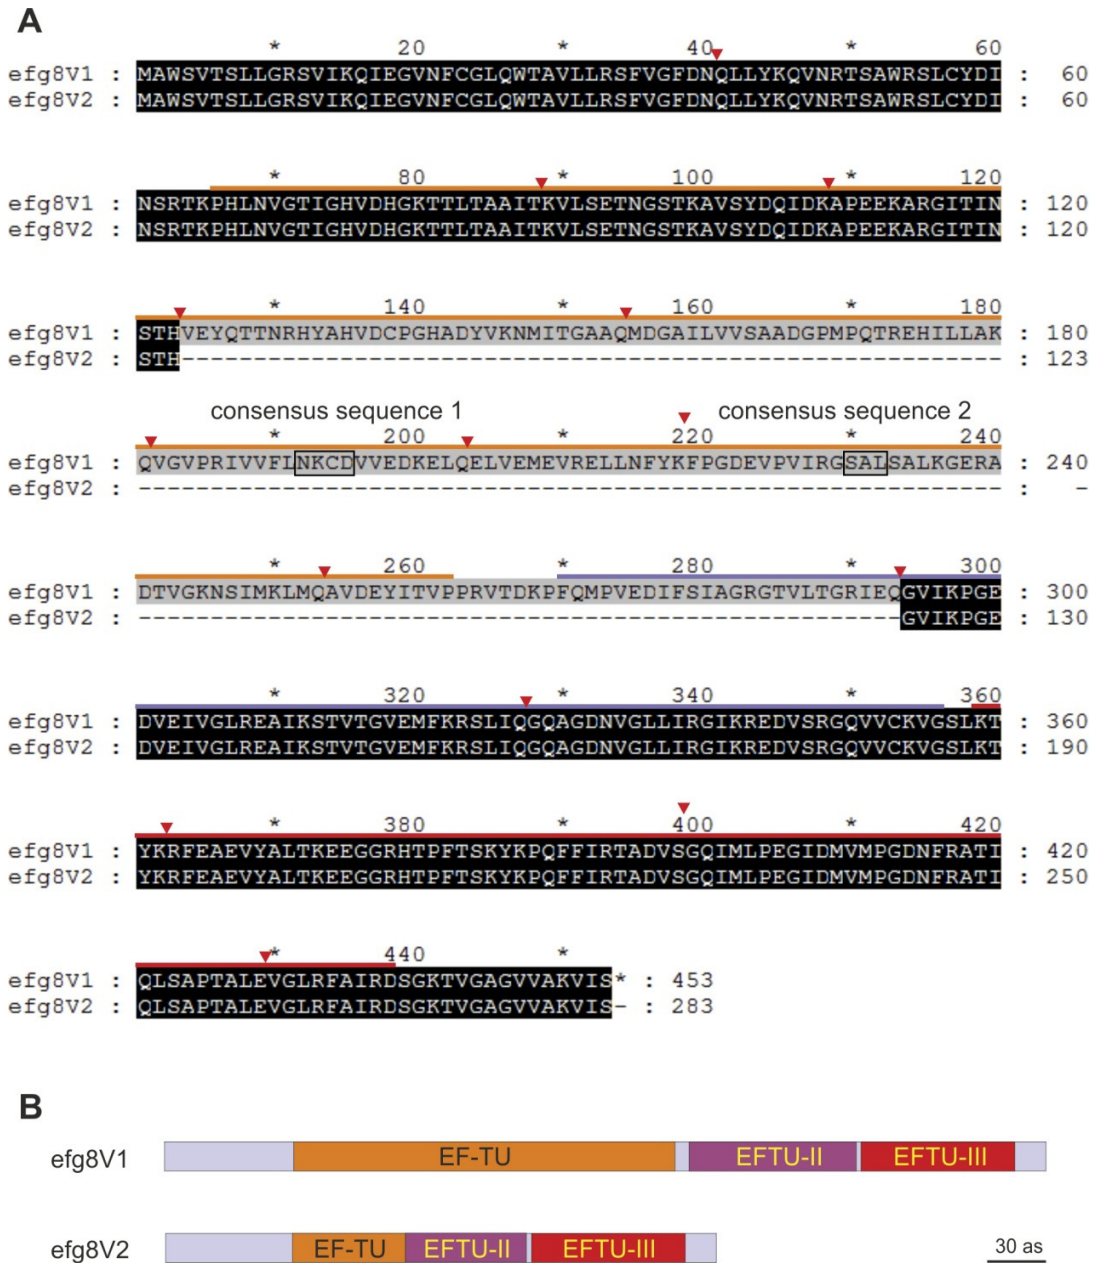

**Figure S2: Comparison protein isoforms encoded by *efg8***

Protein sequence alignment (A) and schematic representation (B) of the deduced amino acid sequences of two alternative splice variants (efg8V1 and efg8V2) of *efg8*. efg8V1 possesses three elongation factor domains, namely EF-TU, EFTU-II and EFTU-III. EF-TU and EFTU-II domains are shortened in efg8V2. Furthermore, two consensus sequences [7], namely Asn-Lys-x-Asp (residues 192 to 195 of efg8V1) and Ser-Ala-Leu/Lys (residues 230 to 232 of efg8V1), which are important to bind guanine nucleotide [7], do not exist in efg8V2. EF-TU, EFTU-II and EFTU-III domains are highlighted in orange, purple and red in (A) and (B), in that order.

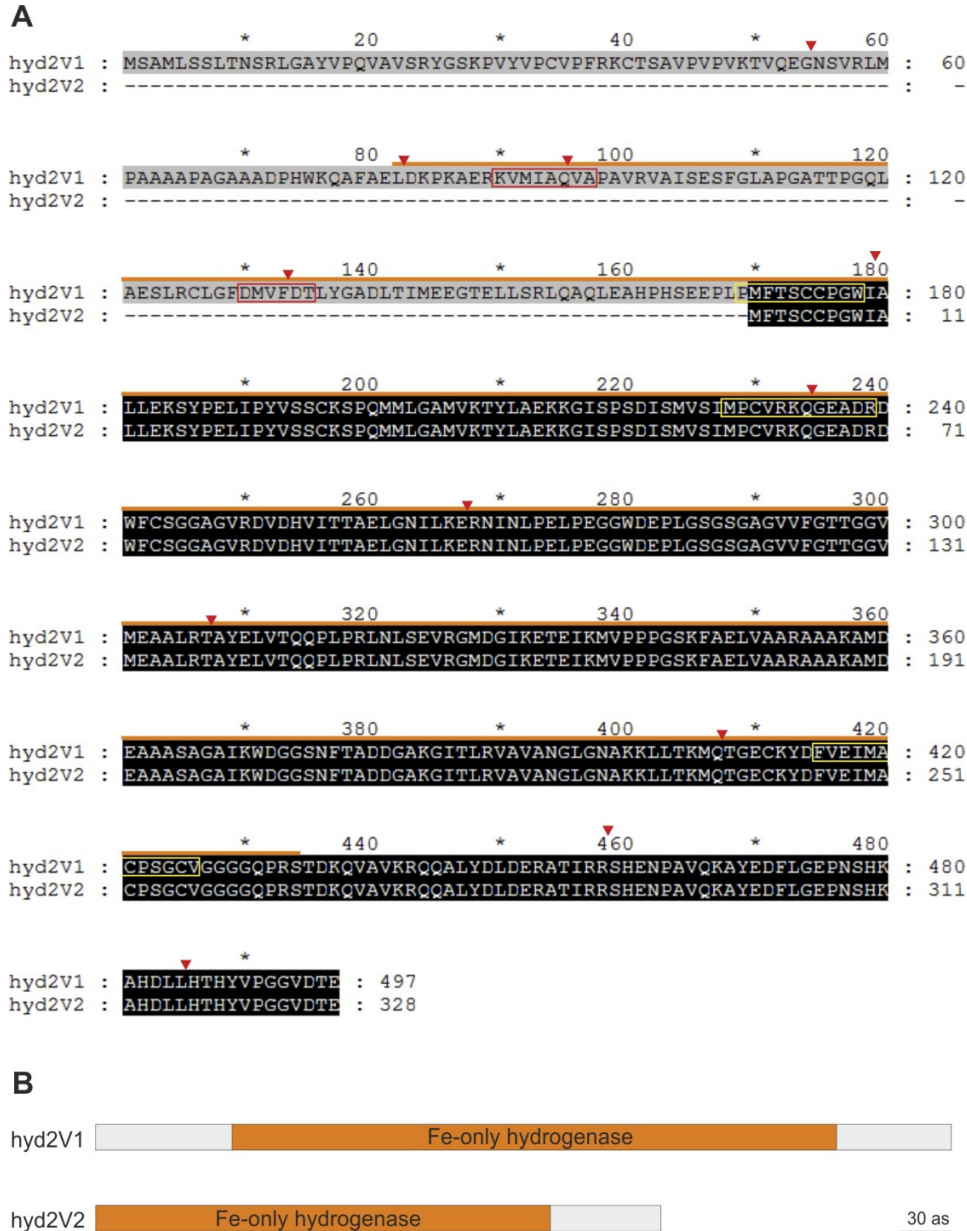

**Figure S3: Comparison protein isoforms encoded by *hyd2***

Protein sequence alignment (A) and schematic representation (B) of the deduced amino acid sequences of two alternative splice variants (hyd2V1 and hyd2V2) of *hyd2*. The alternative splicing causes an N-terminal truncated Fe-only hydrogenase domain in hyd2V2. This second protein variant is 169 amino acid residues shorter than hyd2V1. The amino acid residues 90 to 97 and 130 to 135, which have been shown to form the  $\beta$  sheets around the active site [9], are highlighted by red boxes. Three motifs of the Fe-only hydrogenase active site, namely motif 1 (PMFTSCCPxW, amino acid residues 169 to 178), motif 2 (MPCxxKxxExxR, amino acid residues 228 to 239) and motif 3 (FxExMACxGxCV, amino acid residues 415 to 426) [10] are highlighted by yellow boxes. Thick orange line and orange box are highlighting the Fe-only hydrogenase domain in (A) and (B), respectively.

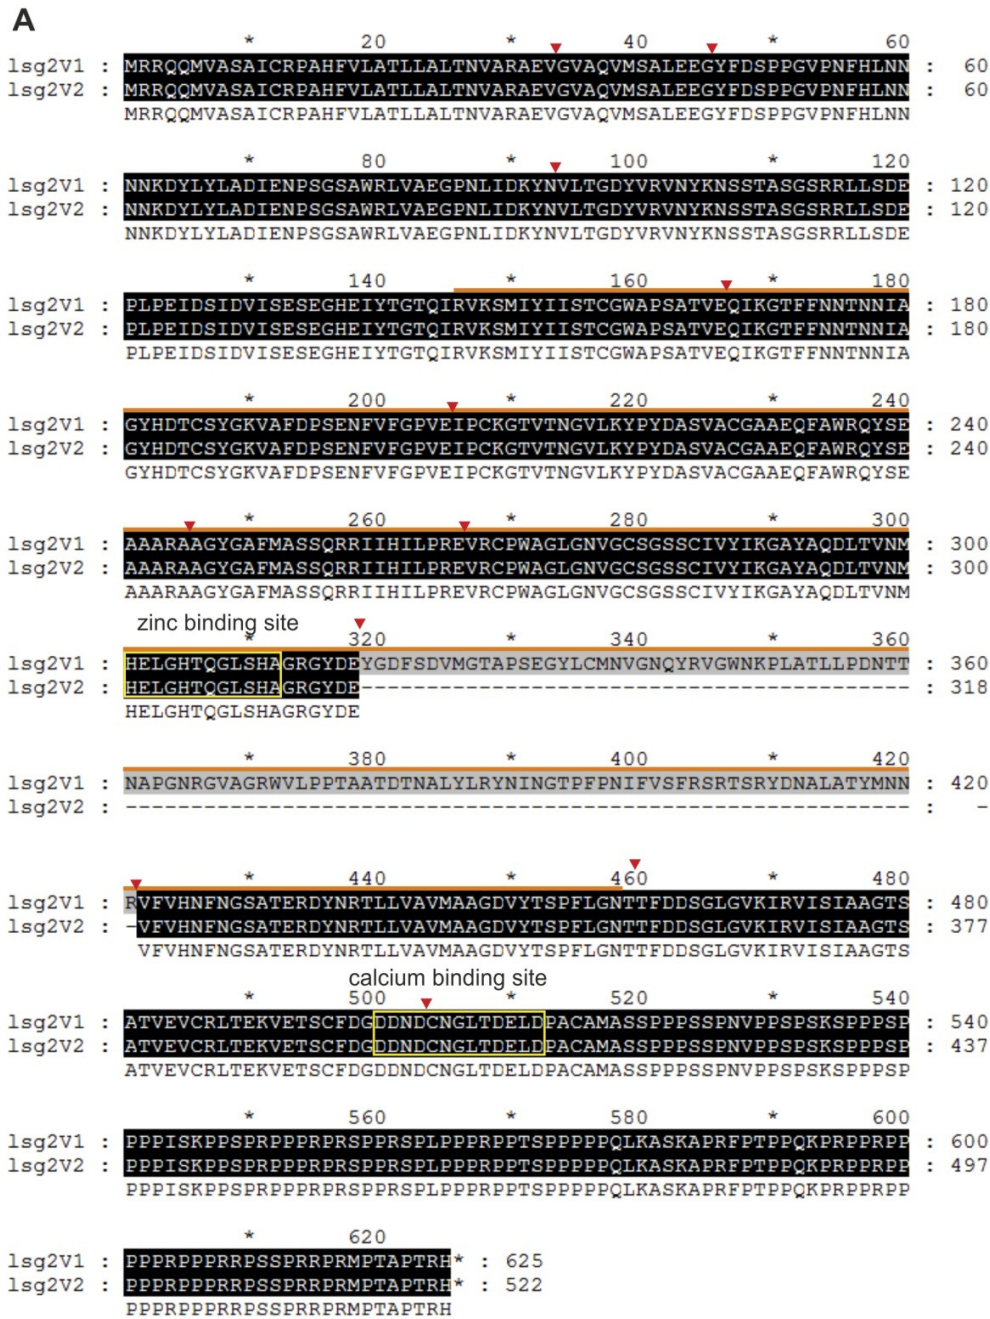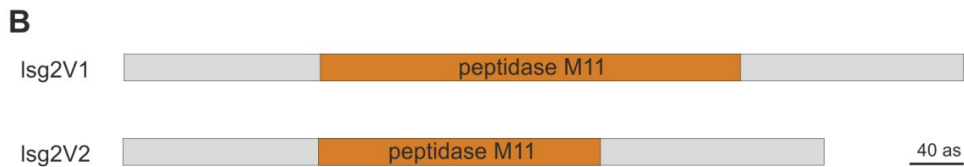

**Figure S4: Comparison protein isoforms encoded by *lgs2***

Protein sequence alignment (A) and schematic representation (B) of the deduced amino acid sequences of two alternative splice variants (lsg2V1 and lsg2V2) of *lgs2*. Peptidase M11 domain of lsg2V2 is 103 amino acid residues shorter than of lsg2V1. Zinc and calcium binding sites of peptidase domain are highlighted by yellow boxes [11]. Peptidase M11 domain is shown by thick orange line and orange box in (A) and (B), respectively.

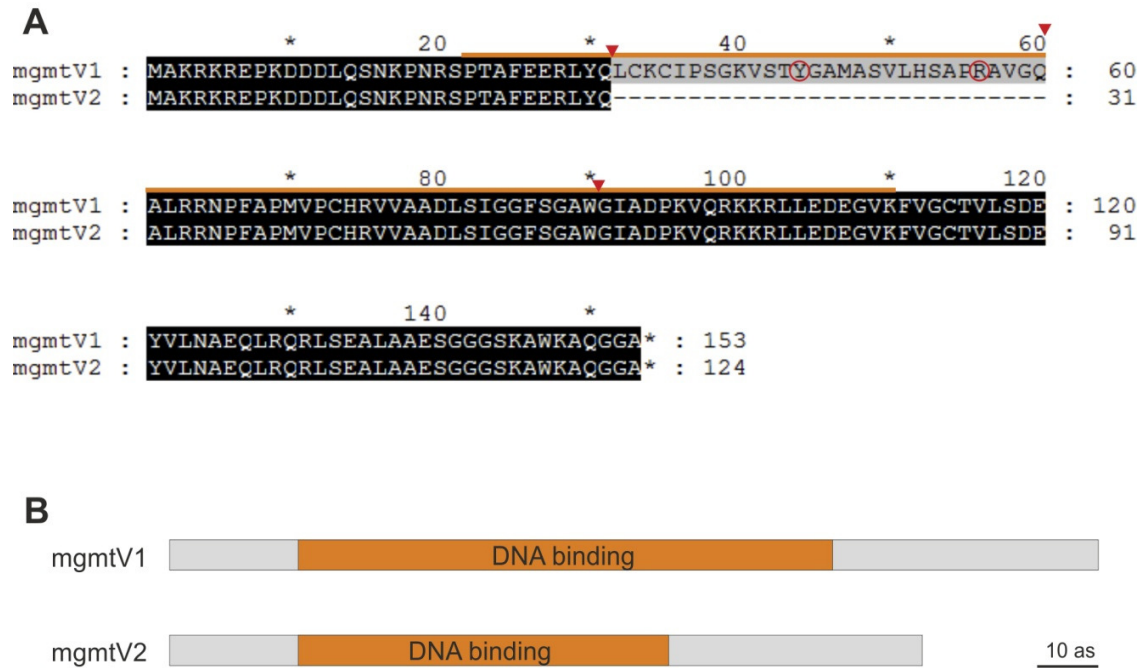

**Figure S5: Comparison protein isoforms encoded by *mgmt***

Protein sequence alignment (A) and schematic representation (B) of the deduced amino acid sequences of two alternative splice variants (*mgmtV1* and *mgmtV2*) of *mgmt*. DNA binding domain is shortened in *mgmtV2*. Two amino acid residues (Y44 and R57), which are important for DNA binding [12, 13], are highlighted by the red circles. Thick orange line and orange box represent the DNA binding domain in (A) and (B), respectively.

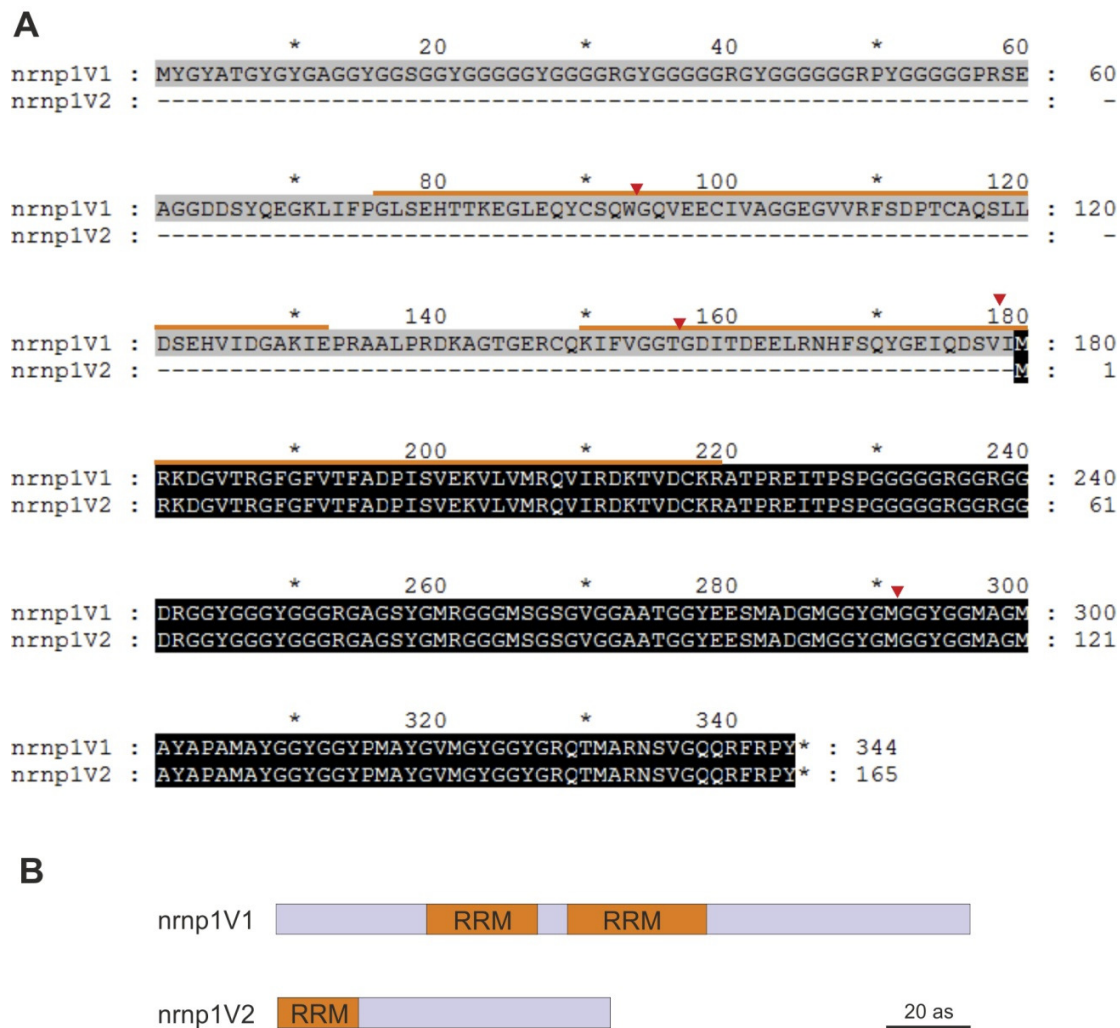

**Figure S6: Comparison protein isoforms encoded by *nrnp1***

Protein sequence alignment (A) and schematic representation (B) of the deduced amino acid sequences of two alternative splice variants (nrnp1V1 and nrnp1V2) of *nrnp1*. nrnp1V1 contains two RNA binding domains. The first RNA binding domain and 30 amino acid residues from the second RRM domain are lacking in nrnp1V2. Both RRM domains are highlighted by orange thick line and orange box in (A) and (B), respectively.



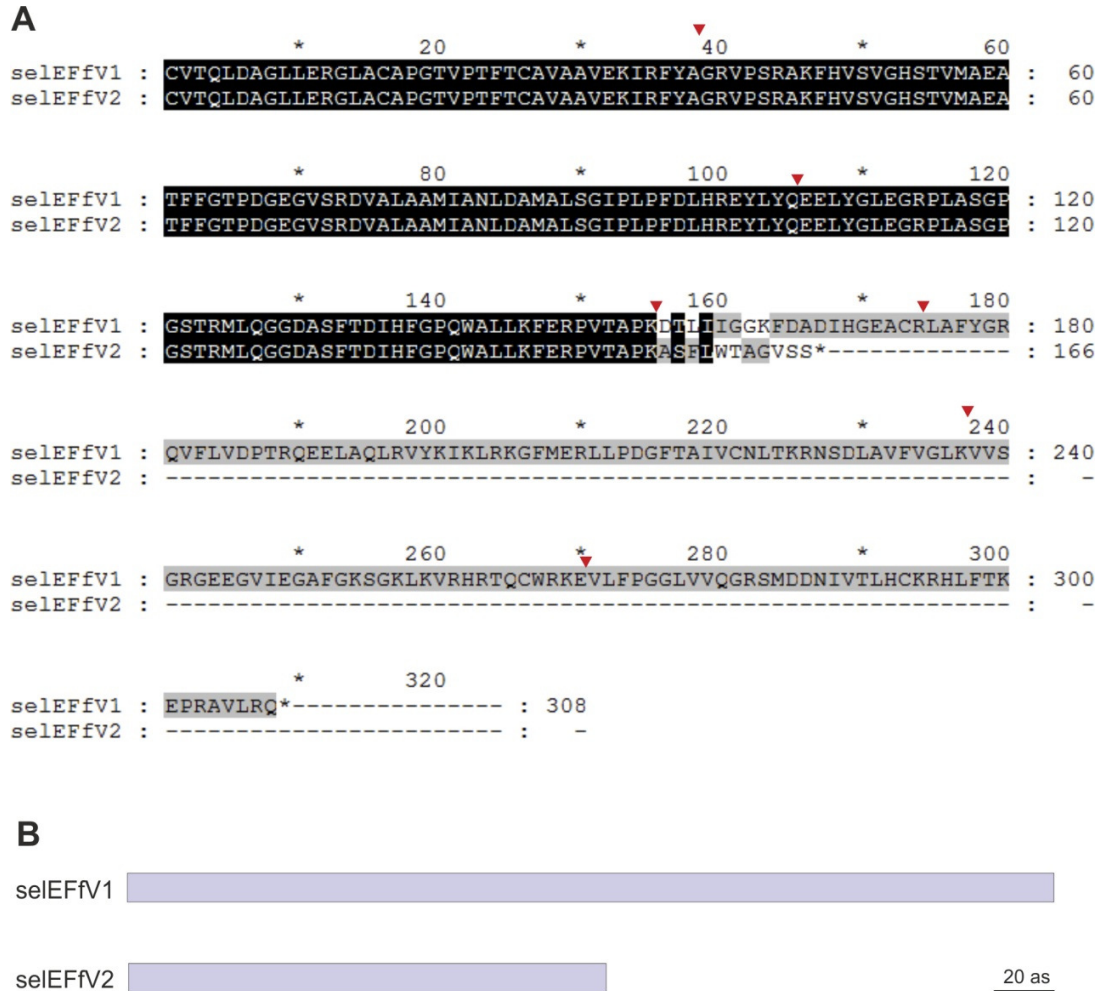

**Figure S7: Comparison protein isoforms encoded by *selEFf***

Protein sequence alignment (A) and schematic representation (B) of the deduced amino acid sequences of two alternative splice variants (selEFfV1 and selEFfV2) of *selEFf*. The introduced premature stop codon by exon skipping leads to generate the second isoform (selEFfV2) which is 142 amino acids shorter than the first one (selEFfV1).

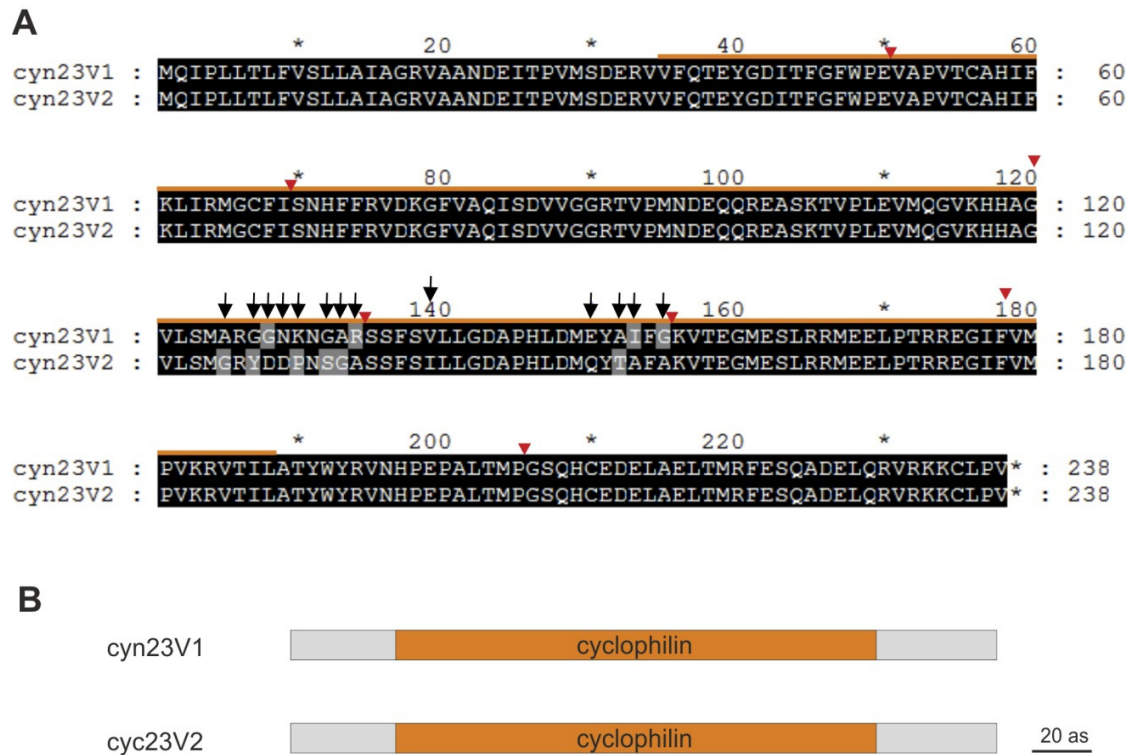

**Figure S8: Comparison protein isoforms encoded by *cyn23***

Protein sequence alignment (A) and schematic representation (B) of the deduced amino acid sequences of two alternative splice variants (*cyn23V1* and *cyn23V2*) of *cyn23*, which are produced by mutually exclusive exons alternative splicing (Figure 3 and Supplemental Figure S11). Both proteins are 238 amino acid residues in length and show differences in amino acid sequence. Arrows indicate the changes in amino acid sequences between *cyn23V1* and *cyn23V2*. Thick orange line marked cyclophilin domain in (A), which is also highlighted by orange box in (B).

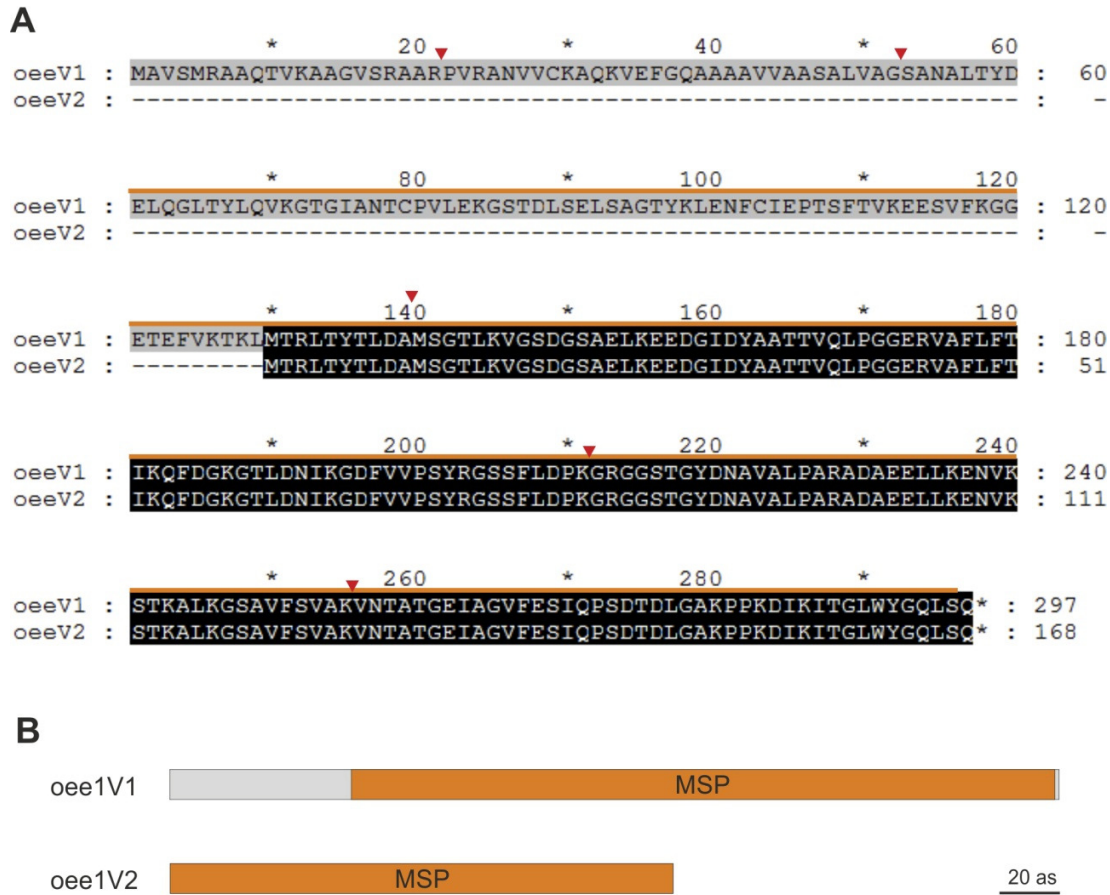

**Figure S9: Comparison protein isoforms encoded by *oee1***

Protein sequence alignment (A) and schematic representation (B) of the deduced amino acid sequences of two alternative splice variants (oee1V1 and oee1V2) of *oee1*. A large part of manganese-stabilising protein (MSP) domain, which is highlighted by orange, is lacking in oee1V2. The domain is highlighted by thick orange line and orange box in (A) and (B), respectively.

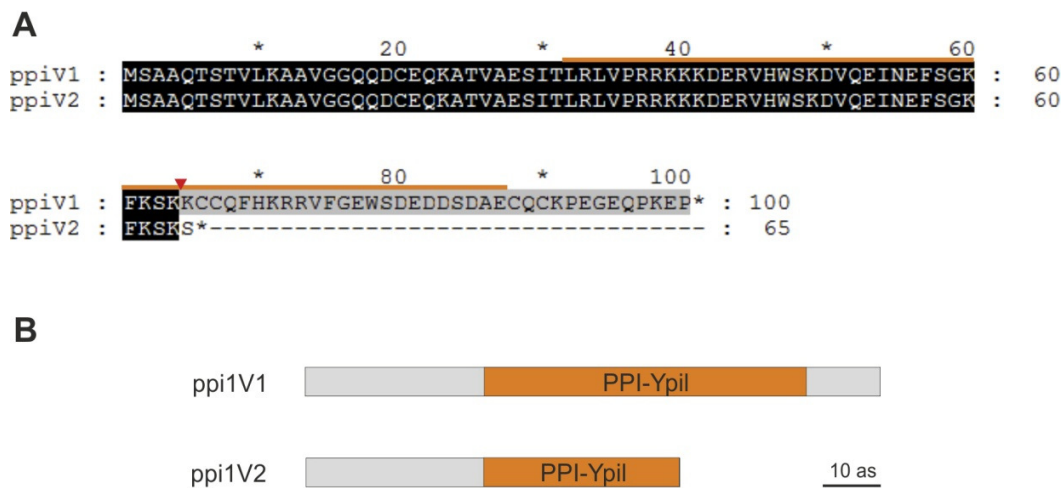

**Figure S10: Comparison protein isoforms encoded by *ppi1***

Protein sequence alignment (A) and schematic representation (B) of the deduced amino acid sequences of two alternative splice variants (ppi1V1 and ppi1V2) of *ppi1*. The C-terminal truncated ppi1V2 lacks 23 amino acid residues of PPI-Ypil (Protein Phosphatase Type 1, heat-stable inhibitor of type 1 protein phosphatase) domain [14]. The PPI-Ypil domain is shown by thick orange line and orange box in (A) and (B), respectively.

```

cyn23V1      ATGCAGATCCCGTTATTAACGCTTTTTGTCTCATTATTGGCGATAGCTGGCAGAGTTGCT
cyn23V2      ATGCAGATCCCGTTATTAACGCTTTTTGTCTCATTATTGGCGATAGCTGGCAGAGTTGCT
*****

cyn23V1      GCAAAATGATGAGATCACCCAGTTATGTCCGATGAACGCGTAGTGTTCCAAACGGAGTAT
cyn23V2      GCAAAATGATGAGATCACCCAGTTATGTCCGATGAACGCGTAGTGTTCCAAACGGAGTAT
*****

cyn23V1      GGTGACATCACGTTCCGGGTTTGGCCAGAGGTGGCGCCGGTAACGTGCGCCCATATTTTC
cyn23V2      GGTGACATCACGTTCCGGGTTTGGCCAGAGGTGGCGCCGGTAACGTGCGCCCATATTTTC
*****

cyn23V1      AAGCTAATCCCGATGGGTTGCTTTATCAGCAACCACTTTTTCCGCGTGGACAAGGGTTTC
cyn23V2      AAGCTAATCCCGATGGGTTGCTTTATCAGCAACCACTTTTTCCGCGTGGACAAGGGTTTC
*****

cyn23V1      GTTGCGCAGATCTCTGATGTCGTAGGTGGTTCGCACGGTTCCTATGAACGATGAGCAGCAG
cyn23V2      GTTGCGCAGATCTCTGATGTCGTAGGTGGTTCGCACGGTTCCTATGAACGATGAGCAGCAG
*****

cyn23V1      AGAGAGGCCTCCAAGACGGTGCCTCGAAGTCATGCAGGGCGTGAAGCACCATGCCGGC
cyn23V2      AGAGAGGCCTCCAAGACGGTGCCTCGAAGTCATGCAGGGCGTGAAGCACCATGCCGGC
*****

cyn23V1      GTGCTTTCTATGGCGCGTGGAGGGAATAAGAACGGCGCACGGAGCAGCTTTTCGGTGCTG
cyn23V2      GTGTTATCGATGGGGCGCTATGATGACCCCAACTCGGGTGCCTTAGCTTCAGCATTCTG
*** * * * * * * * * * * * * * * * * * * * * * * * * * * * * * * * *

cyn23V1      CTGGGCGACGCGCCGCATCTGGATATGGAGTATGCGATCTTTGGCAAGGTGACGGAGGGC
cyn23V2      CTGGGAGATGCACCGCACCTTGACATGCAGTACACCGCATTGGCAAGGTGACGGAGGGC
***** * * * * * * * * * * * * * * * * * * * * * * * * * * * * * *

cyn23V1      ATGGAGTCTCTGCGGCGGATGGAGGAGCTACCGACTAGGCGGGAGGGCATCTTCGTGATG
cyn23V2      ATGGAGTCTCTGCGGCGGATGGAGGAGCTACCGACTAGGCGGGAGGGCATCTTCGTGATG
*****

cyn23V1      CCAGTGAAGCGTGTGACCATTCTTGCAACCTACTGGTACCGCGTCAACCACCCGGAGCCC
cyn23V2      CCAGTGAAGCGTGTGACCATTCTTGCAACCTACTGGTACCGCGTCAACCACCCGGAGCCC
*****

cyn23V1      GCCTTGACGATGCCCGGTTCCAGCATTGTGAGGATGAGCTTGCGGAGCTGACGATGCGG
cyn23V2      GCCTTGACGATGCCCGGTTCCAGCATTGTGAGGATGAGCTTGCGGAGCTGACGATGCGG
*****

cyn23V1      TTCGAAAAGTCAGGCTGACGAGCTACAGCGGGTCCGCAAAAAGTGCCCTGCCCGTTTGA
cyn23V2      TTCGAAAAGTCAGGCTGACGAGCTACAGCGGGTCCGCAAAAAGTGCCCTGCCCGTTTGA
*****

```

**Figure S11: cDNA alignment of *cyn23* splice variants**

cDNA alignment of two splice variants of *cyn23*. Red and blue coloured nucleotides show exons 4 (106 bp in length) and exon 5 (106 bp in length) of *cyn23-V1* and *cyn23-V2*, respectively (Figure 3H). Identical nucleotides are marked by asterisks.

**A*****Arabidopsis thaliana***

| EST number / in thousands | % AS events |
|---------------------------|-------------|
| 176,915                   | 1.5% [1]    |
| 278,734                   | 11.6% [2]   |
| 369,218                   | 21.8% [4]   |
| 756,761                   | 30% [5]     |

***Volvox (V.c.) and Chlamydomonas (C.r.)***

| EST number / in thousands | % AS events       |
|---------------------------|-------------------|
| 252,484 ( <i>C.r.</i> )   | 3% [8]            |
| 132,038 ( <i>V.c.</i> )   | 2.9% [this study] |

**B**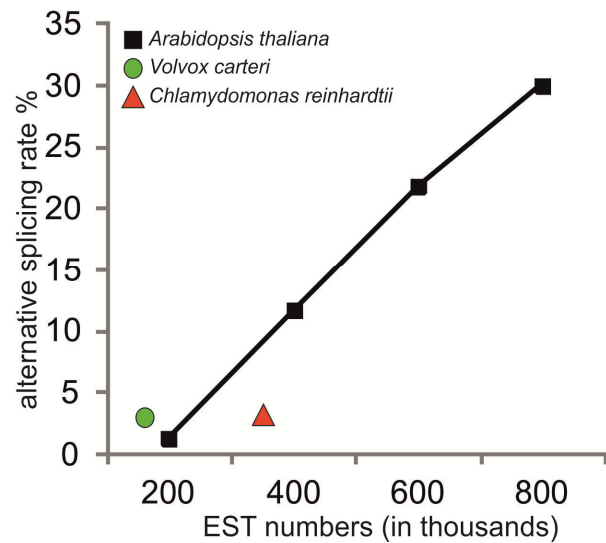

**Figure S12: Relationship between estimated alternative splicing (AS) rate and EST coverage in *Arabidopsis thaliana*, *Volvox carteri* and *Chlamydomonas reinhardtii***

(A) The estimated AS rate in *Arabidopsis* correlates with the increase in the total number of sequenced ESTs. However, quite different EST numbers, i.e., 252,484 and 132,038, respectively, led to detect approximately the same alternative splice rate in both *Volvox* and *Chlamydomonas*. (B) Summary diagram of the relationship between alternative splicing rates and the total number of EST sequences.

## Supplemental Tables

**Table S1: Genome statistics of *Volvox* and other species**

Comparison of the *Volvox carteri* genome with the genomes of *Chlamydomonas reinhardtii*, *Physcomitrella patens*, *Arabidopsis thaliana* and human.

| organism                         | genome size                    | GC content    | average gene size              | average number of exons per gene | average number of introns per gene | average length of introns   | average length of exons     |
|----------------------------------|--------------------------------|---------------|--------------------------------|----------------------------------|------------------------------------|-----------------------------|-----------------------------|
| <i>Volvox carteri</i>            | 138 Mb<br>[15]                 | 56%<br>[15]   | 5.3 kb<br>[15]                 | 7.8<br>[15]                      | 7.05<br>[15]                       | 491 bp<br>[15]              | 194 bp<br>[15]              |
| <i>Chlamydomonas reinhardtii</i> | 118 Mb /<br>121 Mb<br>[15, 16] | 64%<br>[16]   | 4.4 kb /<br>4.3 kb<br>[15, 16] | 8.4/8.3<br>[15, 16]              | 7.4<br>[15]                        | 371 bp / 373 bp<br>[15, 16] | 232 bp / 190 bp<br>[15, 16] |
| <i>Physcomitrella patens</i>     | 511 Mb<br>[17]                 | 38.7%<br>[17] | 2.4 kb<br>[18]                 | 4.9<br>[18]                      | NA*                                | 311 bp<br>[18]              | 246 bp<br>[18]              |
| <i>Arabidopsis thaliana</i>      | 125 Mb<br>[19]                 | 34.9%<br>[19] | 2 kb<br>[19]                   | 5.2<br>[19]                      | 4.2<br>[19]                        | 170 bp<br>[19]              | 251 bp<br>[19]              |
| human                            | 3,200 Mb<br>[20]               | 41%<br>[20]   | 27 kb<br>[20]                  | 8.8<br>[20]                      | 7.8<br>[20]                        | 3,365 bp<br>[20]            | 145 bp<br>[20]              |

\*not available

**Table S2: List of samples genes for experimental verification**

List of ten selected alternatively spliced genes for investigation by RT-PCR and quantitative real-time RT-PCR. The first and second alternative splice variants are indicated as V1 and V2, respectively. ES, exon skipping; ME, mutually exclusive exons; IR, intron retention; Alt5', alternative 5' splice site.

| gene          | NCBI accession number | Gene length | Type of splicing | number of introns and exons in V1 | number of introns and exons in V2 | length of gene product in V1 | length of gene product in V2 | potentially modified domain by alternative splicing                 |
|---------------|-----------------------|-------------|------------------|-----------------------------------|-----------------------------------|------------------------------|------------------------------|---------------------------------------------------------------------|
| <i>clpr2</i>  | XP_002949433 [15]     | 2,599 bp    | ES               | 8 exons<br>7 introns              | 7 exons<br>6 introns              | 284 aa                       | 239 aa                       | caseinolytic protease (Clpr2P) PMID 9390554 [6]                     |
| <i>efg8</i>   | ADI46910 [15, 21]     | 14,590 bp   | ES               | 15 exons<br>14 introns            | 9 exons<br>8 introns              | 453 aa                       | 283 aa                       | EF-Tu subfamily PMID 1542116, 7491491 and 11278992 [22-24]          |
| <i>hyd2</i>   | XP_002948483 [15]     | 4,388 bp    | ES               | 9 exons<br>8 introns              | 7 exons<br>6 introns              | 497 aa                       | 328 aa                       | hydrogenase, Fe-only PMID: 11070057 [25]                            |
| <i>lsg2</i>   | BAB85218 [26]         | 8,333 bp    | ES               | 12 exons<br>11 introns            | 11 exons<br>10 introns            | 625 aa                       | 522 aa                       | gametolysin peptidase M11 PMID:12034745 and 11489172 [27, 28]       |
| <i>mgmt</i>   | XP_002948780 [15]     | 765 bp      | ES               | 4 exons<br>3 introns              | 3 exons<br>2 introns              | 153 aa                       | 124 aa                       | putative 6-O-methylguanine DNA methyltransferase PMID 15221026 [12] |
| <i>nrnp1</i>  | XP_002954050 [15]     | 1,684 bp    | ES               | 5 exons<br>4 introns              | 4 exons<br>3 introns              | 344 aa                       | 165 aa                       | RRM (RNA recognition motif) PMID 10323862 [29]                      |
| <i>selEFf</i> | ADI46882 [21]         | 18,944 bp   | ES               | 7 exons<br>6 introns              | 6 exons<br>5 introns              | 308 aa                       | 166 aa                       | ---                                                                 |
| <i>cyn23</i>  | XP_002953804 [15]     | 3,858 bp    | ME               | 7 exons<br>6 introns              | 7 exons<br>6 introns              | 238 aa                       | 238 aa                       | cyclophilin PMID 8652511 [30]                                       |
| <i>oeel</i>   | XP_002954867 [15]     | 1,553 bp    | IR               | 6 exons<br>5 introns              | 5 exons<br>4 introns              | 297 aa                       | 168 aa                       | manganese-stabilizing protein PMID: 3138527 and 16355230 [31, 32]   |
| <i>ppi1</i>   | XP_002956843 [15]     | 403 bp      | Alt5'            | 2 exons<br>1 intron               | 2 exons<br>1 intron               | 100 aa                       | 65 aa                        | protein phosphatase inhibitor PMID: 14506263 [14]                   |



**Table S3: Names as sequences of oligonucleotide primers**

Names and sequences of oligonucleotide primers used to amplify alternative splicing variants of selected genes in RT-PCRs and quantitative real-time RT-PCRs (see Figure 4 for primer positions). The length of every splice variant is given in square brackets. The intron position is marked by an arrow if a primer spans an exon-exon junction.

| gene name     | specific primers for splice variant 1                                                      | specific primers for splice variant 2                                                  | specific primers to amplify both splice variants in the same RT-PCR reaction                                |
|---------------|--------------------------------------------------------------------------------------------|----------------------------------------------------------------------------------------|-------------------------------------------------------------------------------------------------------------|
| <i>clpr2</i>  | ON15265 (5'-AAGCGTAAGGTCACCACGATG) and ON15266 (5'-GCTTCTTTGATGAAGACCACCTTC) [134 bp]      | ON15265 (5'-AAGCGTAAGGTCACCACGATG) and ON15267 (5'-GAGGGTTGGAACAAC↓GTAGG) [117 bp]     | ON15265 (5'-AAGCGTAAGGTCACCACGATG) and ON15371 (5'-ACGTATTGCATCGTGTCTACAG) [278 bp (V1) and 143 bp (V2)]    |
| <i>efg8</i>   | ON15273 (5'-CACCAATCGCCACTATGCTC) and ON15274 (5'-CAAGAGAATGTGCTCACGAGTC) [151 bp]         | ON15271 (5'-CAATTAATTCCACTACG↓GAGTC) and ON15272 (5'-CACGTCCTCACGCTTTATACC) [176 bp]   | ON15365 (5'-GTCCACAAAGGCTGTTCTTACG) and ON15366 (5'-ACCAGTGACTGTGCTCTTAATCG) [664 bp (V1) and 154 bp (V2)]  |
| <i>hyd2</i>   | ON15275 (5'-GGTGAAGACGGTGCAAGAAG) and ON15276 (5'-TGCCTCAGCCTTTGGCTTG) [128 bp]            | ON15275 (5'-GGTGAAGACGGTGCAAGAAG) and ON15277 (5'-GAGCCTGAAGCCTGCT↓TCCA) [102 bp]      | ON15275 (5'-GGTGAAGACGGTGCAAGAAG) and ON15362 (5'-GGCAGCAGCTAGTAAACATGG) [386 bp (V1) and 159 bp (V2)]      |
| <i>lsg2</i>   | ON15294 (5'-GGTCATCTTGCATCGTGTACATC) and ON15295 (5'-CATGACGTCGGAGAAATCGC) [137 bp]        | ON15294 (5'-GGTCATCTTGCATCGTGTACATC) and ON15296 (5'-GAAGTTGTGCACGAAGAC↓CTCA) [131 bp] | ON15294 (5'-GGTCATCTTGCATCGTGTACATC) and ON15368 (5'-CAGCAGCGTACGGTTGTAATC) [482 bp (V1) and 173 bp (V2)]   |
| <i>mgmt</i>   | ON15278 (5'-GTGTAAAGGCTGATCTCGAGAAAG) and ON15279 (5'-CAGACGGGATACACTTGCAAAG) [173 bp]     | ON15278 (5'-GTGTAAAGGCTGATCTCGAGAAAG) and ON15280 (5'-TTCCGGCGAAGTGC↓CTGGT) [165 bp]   | ON15278 (5'-GTGTAAAGGCTGATCTCGAGAAAG) and ON15367 (5'-TCCTATGCTGAGGTCTGCAG) [310 bp (V1) and 223 bp (V2)]   |
| <i>nrm1</i>   | ON15286 (5'-TGACGACTCGTACCAGGAGG) and ON15287 (5'-CTACGATGCCTCTCGACC) [116 bp]             | ON15286 (5'-TGACGACTCGTACCAGGAGG) and ON15288 (5'-TCGTCCGTAATATCTCC↓CACTG) [107 bp]    | ON15286 (5'-TGACGACTCGTACCAGGAGG) and ON15370 (5'-GAGTCTTGAAATCTCTCCATACTGAG) [342 bp (V1) and 152 bp (V2)] |
| <i>selEFf</i> | ON15289 (5'-AGGAGCTGTACGGCTTGGAG) and ON15290 (5'-TCACCGTGTATATCCGCGTC) [196 bp]           | ON15289 (5'-AGGAGCTGTACGGCTTGGAG) and ON15291 (5'-GTCCATAGAAAGCTAGC↓CTTGG) [166 bp]    | ON15289 (5'-AGGAGCTGTACGGCTTGGAG) and ON15369 (5'-TCGTGAGGTTGCACACAATAGC) [357 bp (V1) and 301 bp (V2)]     |
| <i>cyn23</i>  | ON15268 (5'-CACGGTTCCTATGAACGATGAG) and ON15269 (5'-CACCGAAAAGCTGCTCCGTG) [145 bp]         | ON15268 (5'-CACGGTTCCTATGAACGATGAG) and ON15270 (5'-GAATGCTGAAGCTAGAGGCAC) [146 bp]    | ---                                                                                                         |
| <i>oeel</i>   | ON15281 (5'-CTTCGCTTCCTTTGCCAATTACC) and ON15285 (5'-TTGGCACGGACCGG↓CTGGCAG) [111 bp]      | ON15281 (5'-CTTCGCTTCCTTTGCCAATTACC) and ON15284 (5'-GGAGTTACGATATGGCTATGGTC) [158 bp] | ON15281 (5'-CTTCGCTTCCTTTGCCAATTACC) and ON15364 (5'-GATGCAGAAGTTCTCCAGCTTG) [346 bp (V1) and 415 bp (V2)]  |
| <i>ppi1</i>   | ON15300 (5'-CAGTAGCAGAGTCCATTACATTGC) and ON15302 (5'-CTTATGAAACTGACAGCACT↓TCTTC) [140 bp] | ON15300 (5'-CAGTAGCAGAGTCCATTACATTGC) and ON15301 (5'-CTGAAAGCCTCAGCACCTAAC) [141 bp]  | ON15300 (5'-CAGTAGCAGAGTCCATTACATTGC) and ON15363 (5'-ATGGCTCCTTAGGTTGCTCTC) [228 bp (V1) and 249 bp (V2)]  |

**Table S4: Alternative splicing status of orthologous genes between *Volvox* and its close relative *Chlamydomonas***

Names and sequences of oligonucleotide primers used to amplify alternative splicing variants of selected genes in RT-PCRs and quantitative real-time RT-PCRs (see Figure 4 for primer positions). The length of every splice variant is given in square brackets. The intron position is marked by an arrow if a primer spans an exon-exon junction.

Blue background: 10 alternatively spliced genes selected for experimental verification in this study

Yes (green background): genes with alternative splicing events

No (red background): no alternative splicing events were identified

Numbers: represent the EST coverage for those genes that do not exhibit alternative splice events in *Chlamydomonas* based on available data ([http://phytozome.jgi.doe.gov/pz/portal.html#!info?alias=Org\\_Creinhardtii](http://phytozome.jgi.doe.gov/pz/portal.html#!info?alias=Org_Creinhardtii))

| Gene model | Gene description / accession number in <i>Volvox</i>                    | Gene description / accession number in <i>Chlamydomonas</i>                                  | alternatively spliced in |                      |
|------------|-------------------------------------------------------------------------|----------------------------------------------------------------------------------------------|--------------------------|----------------------|
|            |                                                                         |                                                                                              | <i>Volvox</i>            | <i>Chlamydomonas</i> |
| 1          | chloroplast Clp protease (clpr2) / XM_002949387                         | non-catalytic subunit of chloroplast ClpP complex / EDP04400                                 | Yes                      | No (~50)             |
| 2          | mitochondrial translation elongation factor Tu (efg8) / XM_002958233    | mitochondrial translation factor Tu, putative mitochondrial translation factor Tu / EDP08321 | Yes                      | Yes                  |
| 3          | iron hydrogenase (hyd2) / XM_002948437                                  | iron hydrogenase / EDP02498                                                                  | Yes                      | Yes                  |
| 4          | matrix metalloproteinase (lsg2) / BAB85218                              | Gametolysin peptidase M11 / EDP02375                                                         | Yes                      | No (~100)            |
| 5          | 6-O-methylguanine DNA methyltransferase (mgmt) / EFJ50160               | Methylated-DNA-[protein]-cysteine S-methyltransferase / EDP01091                             | Yes                      | No (~30)             |
| 6          | nuclear ribonucleoprotein (nrnp1) / EFJ44767                            | nuclear ribonucleoprotein / EDP06492                                                         | Yes                      | No (~50)             |
| 7          | selenocysteine-specific elongation factor (seIEff) / ADI46882           | selenocysteine-specific elongation factor EF-Sec / EDP08320                                  | Yes                      | Yes                  |
| 8          | cyclophilin-type peptidyl-prolyl cis-trans isomerase (cyn23) / EFJ45128 | cyclophilin-like protein / XP_001701608                                                      | Yes                      | No (~40)             |
| 9          | oxygen evolving enhancer protein 1 (oee1) / AF110780                    | Oxygen-evolving enhancer protein 1 / P12853                                                  | Yes                      | No (~80)             |
| 10         | protein phosphatase inhibitor (ppi1) / XM_002956797                     | flagellar associated protein, protein phosphatase inhibitor / EDO97732                       | Yes                      | Yes                  |
| 11         | eukaryotic translation elongation factor 1 alpha 2 / XM_002945745       | eukaryotic translation elongation factor 1 alpha 2 / EDO96967                                | Yes                      | No (~50)             |
| 12         | leucine rich repeats / XP_002945949                                     | flagellar associated protein, leucine rich repeat / EDP08219                                 | Yes                      | No (26)              |
| 13         | RNA-binding protein / XP_002945692                                      | nucleic acid binding protein / EDP09553                                                      | Yes                      | Yes                  |
| 14         | arogenate/prephenate dehydrogenase / XP_002945921                       | arogenate/prephenate dehydrogenase / EDP01548                                                | Yes                      | No (~50)             |
| 15         | leucine-rich repeat receptor-like protein kinase / XP_002945643         | leucine-rich repeat receptor-like protein kinase / EDO99036                                  | Yes                      | Yes                  |
| 16         | 20S proteasome alpha subunit E / EFJ52696                               | 20S proteasome alpha subunit E / EDP00486                                                    | Yes                      | No (~60)             |
| 17         | leucine rich repeat / EFJ52641                                          | coiled-coil domain-containing protein lobo homolog / A8JAM0                                  | Yes                      | No (~100)            |
| 18         | hypothetical protein VOLCADRAFT_102812 / EDP08472                       | predicted protein / EDP08472                                                                 | Yes                      | Yes                  |
| 19         | ribosomal protein S18 / EFJ53218                                        | 核糖体ribosomal protein S18 / EDP08449                                                          | Yes                      | No (~30)             |
| 20         | plastid/chloroplast ribosomal protein L28 / EFJ53271                    | plastid ribosomal protein L28 / EDP08523                                                     | Yes                      | No (~50)             |
| 21         | ribosomal protein L21 / EFJ53106                                        | ribosomal protein L21 / EDO99609                                                             | Yes                      | No (~40)             |
| 22         | hypothetical protein VOLCADRAFT_102758 / EFJ53137                       | predicted protein / EDP08274                                                                 | Yes                      | No (~30)             |

|    |                                                                                          |                                                                          |     |          |
|----|------------------------------------------------------------------------------------------|--------------------------------------------------------------------------|-----|----------|
| 23 | nucleic acid binding protein nab1 / ABM47305                                             | nucleic acid binding protein nab1 / EDP08495                             | Yes | No (~70) |
| 24 | bardet-Biedl syndrome 5 / EFJ53283                                                       | bardet-biedl syndrome 5 protein / EDP08230                               | Yes | Yes      |
| 25 | Oligosaccharyltransferase, beta subunit / EFJ53013                                       | dolichyl-diphosphooligosaccharide-protein glycosyltransferase / EDO99098 | Yes | No (~50) |
| 26 | nucleolar protein involved in 40S ribosome biogenesis / EFJ53161                         | nucleolar protein / EDP08566                                             | Yes | Yes      |
| 27 | component of cytosolic 80S ribosome and 60S large subunit / EFJ52307                     | ribosomal protein L15 / EDP06755                                         | Yes | No (~40) |
| 28 | hypothetical protein VOLCADRAFT_72703, RNA-binding protein / EFJ52313                    | predicted protein, RNA-binding protein / EDP06734                        | Yes | No (~30) |
| 29 | component of cytosolic 80S ribosome and 60S large subunit / EFJ52575                     | ribosomal protein L35 / EDP09570                                         | Yes | No (~50) |
| 30 | putative signal transduction protein p25 / EFJ52595                                      | flagellar associated protein / EDP02168                                  | Yes | Yes      |
| 31 | AP_delta-COPI_MHD / EFJ52476                                                             | delta-cop / EDP06738                                                     | Yes | No (~60) |
| 32 | hypothetical protein VOLCADRAFT_102959 / EFJ52464                                        | hypothetical protein CHLREDRAFT_141551 / EDP06961                        | Yes | No (~30) |
| 33 | serine/threonine phosphatases / EFJ40674                                                 | serine/threonine protein phosphatase / EDP08334                          | Yes | Yes      |
| 34 | component of cytosolic 80S ribosome and 40S small subunit / EFJ51026                     | ribosomal protein S7 / EDO96962                                          | Yes | No (~60) |
| 35 | tubulin alpha-1/alpha-2 chain / P11481                                                   | tubulin alpha-1 chain / P09204                                           | Yes | No (~30) |
| 36 | nucleosome assembly protein (NAP) / EFJ42879                                             | nucleosome assembly protein / EDP00863                                   | Yes | No (~50) |
| 37 | hypothetical protein VOLCADRAFT_82819, putative substrate binding site / EFJ44426        | predicted protein, putative ATP binding site / EDP08635                  | Yes | No (~30) |
| 38 | tubulin beta chain / P11482                                                              | Tubulin beta-1/beta-2 chain / P04690                                     | Yes | No (~50) |
| 39 | Peptide methionine sulfoxide reductase / EFJ40180                                        | peptide methionine sulfoxide reductase / EDP09617                        | Yes | No (~60) |
| 40 | light-harvesting protein of photosystem I / EFJ40348                                     | light-harvesting protein of photosystem I / EDP01593                     | Yes | No (~60) |
| 41 | hypothetical protein VOLCADRAFT_107753 / EFJ41282                                        | predicted protein / EDO99878                                             | Yes | No (~60) |
| 42 | hypothetical protein VOLCADRAFT_107125 / EFJ42773                                        | predicted protein / EDP09346                                             | Yes | Yes      |
| 43 | component of cytosolic 80S ribosome and 40S small subunit / EFJ43680                     | ribosomal protein S10 / EDP00807                                         | Yes | Yes      |
| 44 | Pherophorin / EFJ45544                                                                   | cell wall protein pherophorin-C1 / EDO95895                              | Yes | No (~60) |
| 45 | eukaryotic translation initiation factor 5A / EFJ48283                                   | eukaryotic initiation factor / EDP07536                                  | Yes | No (~50) |
| 46 | hypothetical protein VOLCADRAFT_74648, PsbP domain-containing protein / EFJ48537         | predicted protein, PsbP domain-containing protein 4 / EDP03267           | Yes | No (~60) |
| 47 | heat shock protein 70B / EFJ40669                                                        | heat shock protein 70B / EDP08409                                        | Yes | No (~50) |
| 48 | s-adenosylmethionine synthase / ADI46846                                                 | s-adenosylmethionine synthase / A8HYU5                                   | Yes | No (~70) |
| 49 | ribulose-bisphosphate carboxylase small subunit / XP_002955684                           | ribulose bisphosphate carboxylase small chain 1 / P00873                 | Yes | Yes      |
| 50 | hypothetical protein VOLCADRAFT_107619, CCC1-related family of proteins / EFJ41666       | predicted protein, nodulin-21 and CCC1-related protein family / EDP07718 | Yes | Yes      |
| 51 | F1F0 ATP synthase, subunit C / EFJ42381                                                  | F1F0 ATP synthase subunit 9 / EDO97408                                   | Yes | Yes      |
| 52 | hypothetical protein VOLCADRAFT_75409, phosphopantetheine attachment site / XP_002952514 | acyl-carrier protein / EDP09036                                          | Yes | No (~30) |
| 53 | plastid/chloroplast ribosomal protein L35 / EFJ47858                                     | plastid ribosomal protein L35 / EDO97643                                 | Yes | No (16)  |
| 54 | hypothetical protein VOLCADRAFT_106042, Pleckstrin                                       | predicted protein, alpha-ketoglutarate decarboxylase / EDP06665          | Yes | No (~30) |

|    |                                                                                                               |                                                                    |     |           |
|----|---------------------------------------------------------------------------------------------------------------|--------------------------------------------------------------------|-----|-----------|
|    | homology-like domain / EFJ45228                                                                               |                                                                    |     |           |
| 55 | hypothetical protein VOLCADRAFT_105932, OST3 / OST6 family / EFJ45380                                         | predicted membrane protein, OST3-OST6 family / EDP00559            | Yes | No (~30)  |
| 56 | hypothetical protein VOLCADRAFT_107666, HAT (Half-A-TPR) repeats / XP_002957409                               | nuclear pre-mRNA splicing factor and U1 snRNP component / EDO98818 | Yes | Yes       |
| 57 | axonemal dynein light chain / EFJ42000                                                                        | flagellar inner arm dynein light chain p28 / EDO97971              | Yes | No (~30)  |
| 58 | DEAD-box RNA helicase, ATP-dependent / EFJ43482                                                               | DEAD-box RNA helicase / EDP09760                                   | Yes | No (~50)  |
| 59 | hypothetical protein VOLCADRAFT_105833, ParB-like nuclease domain / EFJ45749                                  | sulfiredoxin / EDO97150                                            | Yes | No (13)   |
| 60 | hypothetical protein VOLCADRAFT_104697, HR-like lesion-inducin / EFJ48515                                     | predicted protein, HR-like lesion-inducing / EDP04339              | Yes | No (~50)  |
| 61 | hypothetical protein VOLCADRAFT_104422, FUN14 family / EFJ49205                                               | predicted protein, FUN14 family / EDP04838                         | Yes | Yes       |
| 62 | long-chain acyl-CoA synthetases / XP_002949145                                                                | long-chain-fatty-acid CoA ligase / EDP05022                        | Yes | No (~60)  |
| 63 | hypothetical protein VOLCADRAFT_84253, WD40 repeat / EFJ40989                                                 | U5 snRNP-specific protein / EDP08353                               | Yes | No (~50)  |
| 64 | hypothetical protein VOLCADRAFT_98257, large tegument protein UL36 / EFJ41679                                 | predicted protein / EDP03306                                       | Yes | No (~70)  |
| 65 | hypothetical protein VOLCADRAFT_76090, Thioredoxin (TRX) domain containing protein 9 / XP_002953944           | thioredoxin-like ATP binding protein 2 / EDP09856                  | Yes | No (~30)  |
| 66 | hypothetical formate nitrite transporter / EFJ48615                                                           | formate nitrite transporter / EDO98442                             | Yes | Yes       |
| 67 | Ubiquinol-cytochrome C reductase hinge protein / EFJ49241                                                     | ubiquinol:cytochrome c oxidoreductase 8 kDa subunit / EDO99747     | Yes | Yes       |
| 68 | intraflagellar transport protein IFT20 / EFJ49364                                                             | intraflagellar transport particle protein 20 / EDP06941            | Yes | Yes       |
| 69 | hypothetical protein VOLCADRAFT_120666, RNA recognition motif / EFJ50216                                      | SR protein factor / EDP08875                                       | Yes | No (~40)  |
| 70 | uroporphyrinogen decarboxylase chloroplast precursor / EFJ50429                                               | uroporphyrinogen decarboxylase / EDP06796                          | Yes | No (~40)  |
| 71 | hypothetical protein VOLCADRAFT_120394, cAMP-regulated phosphoprotein/endosulfine conserved / EFJ52215 region | predicted protein, Chromosome segregation ATPases / EDP04959       | Yes | No (~100) |
| 72 | radial spokehead-like protein / EFJ40102                                                                      | flagellar radial spoke protein 4 / Q01656                          | Yes | Yes       |
| 73 | hypothetical protein, type III pyridoxal 5-phosphate (PLP)-dependent / XM_002958599                           | ornithine decarboxylase / AJ581668                                 | Yes | Yes       |
| 74 | triose-phosphate Transporter family / XM_002958091                                                            | triose phosphate transporter / AY177787                            | Yes | No (~60)  |
| 75 | component of cytosolic 80S ribosome and 40S small subunit / EFJ44096                                          | ribosomal protein S4 / EDP04951                                    | Yes | No (~30)  |
| 76 | hypothetical protein, chlorophyll A-B binding protein / EFJ44207                                              | early light-inducible protein / EDP02335                           | Yes | No (~30)  |
| 77 | hypothetical protein / EFJ44711                                                                               | predicted protein / EDP07079                                       | Yes | No (17)   |
| 78 | cyclophilin_ABH_like / EFJ45179                                                                               | peptidyl-prolyl cis-trans isomerase, cyclophilin-type / EDO98214   | Yes | No (~30)  |
| 79 | hypothetical protein, ribosome associated membrane protein / EFJ44791                                         | predicted protein, ribosome associated membrane protein / EDP00157 | Yes | No (~30)  |
| 80 | hypothetical protein, cytochrome b6f complex subunit 7 / EFJ45349                                             | cytochrome b6-f complex subunit 7 / Q42496                         | Yes | No (~30)  |
| 81 | hypothetical protein, K homology RNA-                                                                         | predicted protein, nucleic acid binding                            | Yes | No (~30)  |

|     |                                                                                          |                                                                 |     |          |
|-----|------------------------------------------------------------------------------------------|-----------------------------------------------------------------|-----|----------|
|     | binding domain / EFJ46104                                                                | region / EDP01252                                               |     |          |
| 82  | hypothetical protein / EFJ47103                                                          | predicted protein, chloroplast location proposed / XP_001703377 | Yes | Yes      |
| 83  | hypothetical protein VOLCADRAFT_105076 / EFJ47604                                        | predicted protein / EDO99963                                    | Yes | Yes      |
| 84  | ferredoxin like, hypothetical                                                            | ferredoxin, adrenodoxin-like protein / EDO96620                 | Yes | No (~30) |
| 85  | hypothetical protein, protein Kinases, catalytic domain / XP_002948316                   | glycogen synthase kinase 3 / EDP05327                           | Yes | Yes      |
| 86  | hypothetical protein / EFJ51470                                                          | predicted protein / EDP03488                                    | Yes | Yes      |
| 87  | ATP synthase subunit D / EFJ51827                                                        | vacuolar ATP synthase subunit D / EDP01852                      | Yes | No (~30) |
| 88  | hypothetical protein, archease protein family / EFJ53137                                 | predicted protein, archease protein family / EDP08274           | Yes | No (~30) |
| 89  | hypothetical protein, pyridoxamine 5'-phosphate oxidase / EFJ40229                       | predicted protein, pyridoxamine 5'-phosphate oxidase / EDP07732 | Yes | No (~50) |
| 90  | NADH:ubiquinone oxidoreductase 18 kDa subunit / EFJ40445                                 | NADH:ubiquinone oxidoreductase 18 kDa subunit / EDP01388        | Yes | Yes      |
| 91  | ALB3_1f / ADI46852                                                                       | inner membrane ALBINO3-like protein 1 / EDP08623                | Yes | No (~40) |
| 92  | hypothetical protein, pyruvate formate lyase 1 / EFJ40790                                | pyruvate-formate lyase / EDP09457                               | Yes | No (~70) |
| 93  | component of cytosolic 80S ribosome and 40S small subunit / EFJ41382                     | ribosomal protein S12 / EDO99351                                | Yes | Yes      |
| 94  | hypothetical protein, Kelch domain / EFJ41755                                            | predicted protein, Kelch domain / EDP03274                      | Yes | No (~50) |
| 95  | hypothetical protein / EFJ41890                                                          | predicted protein / EDP07800                                    | Yes | No (~30) |
| 96  | hypothetical protein, WD40 domain / EFJ43030                                             | guanine nucleotide-binding protein / EDP05920                   | Yes | No (~30) |
| 97  | bola-like protein / EFJ43764                                                             | BolA-like protein / EDP02592                                    | Yes | No (~30) |
| 98  | hypothetical protein, tocopherol O-methyltransferase / EFJ46509                          | N-myristoyl transferase / EDP08632                              | Yes | No (~40) |
| 99  | hypothetical protein, branched-chain-amino-acid aminotransferase-like protein / EFJ50280 | aminotransferase / EDP08786                                     | Yes | Yes      |
| 100 | putative FKBP-type peptidyl-prolyl cis-trans isomerases 1 / EFJ50220                     | peptidyl-prolyl cis-trans isomerase, FKBP-type / EDP08869       | Yes | No (~40) |

## Supplemental References

1. Zhu W, Schlueter SD, Brendel V: **Refined annotation of the *Arabidopsis* genome by complete expressed sequence tag mapping.** *Plant Physiol* 2003, **132**(2):469-484.
2. Iida K, Seki M, Sakurai T, Satou M, Akiyama K, Toyoda T, Konagaya A, Shinozaki K: **Genome-wide analysis of alternative pre-mRNA splicing in *Arabidopsis thaliana* based on full-length cDNA sequences.** *Nucleic Acids Res* 2004, **32**(17):5096-5103.
3. Nicholas KB, Nicholas HB, Deerfield DW: **GeneDoc: Analysis and visualization of genetic variation.** *EMBnetnews* 1997, **4**:14.
4. Wang BB, Brendel V: **Genomewide comparative analysis of alternative splicing in plants.** *Proc Natl Acad Sci U S A* 2006, **103**(18):7175-7180.
5. Campbell MA, Haas BJ, Hamilton JP, Mount SM, Buell CR: **Comprehensive analysis of alternative splicing in rice and comparative analyses with *Arabidopsis*.** *BMC Genomics* 2006, **7**:327.
6. Wang J, Hartling JA, Flanagan JM: **The structure of ClpP at 2.3 Å resolution suggests a model for ATP-dependent proteolysis.** *Cell* 1997, **91**(4):447-456.
7. Bourne HR, Sanders DA, McCormick F: **The GTPase superfamily: conserved structure and molecular mechanism.** *Nature* 1991, **349**(6305):117-127.
8. Labadorf A, Link A, Rogers MF, Thomas J, Reddy AS, Ben-Hur A: **Genome-wide analysis of alternative splicing in *Chlamydomonas reinhardtii*.** *BMC Genomics* 2010, **11**:114.
9. Peters JW, Lanzilotta WN, Lemon BJ, Seefeldt LC: **X-ray crystal structure of the Fe-only hydrogenase (CpI) from *Clostridium pasteurianum* to 1.8 Angstrom resolution.** *Science* 1998, **282**(5395):1853-1858.
10. Forestier M, King P, Zhang L, Posewitz M, Schwarzer S, Happe T, Ghirardi ML, Seibert M: **Expression of two [Fe]-hydrogenases in *Chlamydomonas reinhardtii* under anaerobic conditions.** *Eur J Biochem* 2003, **270**(13):2750-2758.
11. Hooper NM: **Families of zinc metalloproteases.** *FEBS Lett* 1994, **354**(1):1-6.
12. Daniels DS, Woo TT, Luu KX, Noll DM, Clarke ND, Pegg AE, Tainer JA: **DNA binding and nucleotide flipping by the human DNA repair protein AGT.** *Nat Struct Mol Biol* 2004, **11**(8):714-720.
13. Duguid EM, Rice PA, He C: **The structure of the human AGT protein bound to DNA and its implications for damage detection.** *J Mol Biol* 2005, **350**(4):657-666.
14. García-Gimeno MA, Muñoz I, Ariño J, Sanz P: **Molecular characterization of Ypi1, a novel *Saccharomyces cerevisiae* type 1 protein phosphatase inhibitor.** *J Biol Chem* 2003, **278**(48):47744-47752.
15. Prochnik SE, Umen J, Nedelcu AM, Hallmann A, Miller SM, Nishii I, Ferris P, Kuo A, Mitros T, Fritz-Laylin LK *et al*: **Genomic analysis of organismal complexity in the multicellular green alga *Volvox carteri*.** *Science* 2010, **329**(5988):223-226.
16. Merchant SS, Prochnik SE, Vallon O, Harris EH, Karpowicz SJ, Witman GB, Terry A, Salamov A, Fritz-Laylin LK, Marechal-Drouard L *et al*: **The *Chlamydomonas* genome reveals the evolution of key animal and plant functions.** *Science* 2007, **318**(5848):245-250.
17. Lang D, Zimmer AD, Rensing SA, Reski R: **Exploring plant biodiversity: the *Physcomitrella* genome and beyond.** *Trends Plant Sci* 2008, **13**(10):542-549.
18. Rensing SA, Lang D, Zimmer AD, Terry A, Salamov A, Shapiro H, Nishiyama T, Perroud PF, Lindquist EA, Kamisugi Y *et al*: **The *Physcomitrella* genome reveals evolutionary insights into the conquest of land by plants.** *Science* 2008, **319**(5859):64-69.
19. Arabidopsis Genome Initiative: **Analysis of the genome sequence of the flowering plant *Arabidopsis thaliana*.** *Nature* 2000, **408**(6814):796-815.
20. Lander ES, Linton LM, Birren B, Nusbaum C, Zody MC, Baldwin J, Devon K, Dewar K, Doyle M, FitzHugh W *et al*: **Initial sequencing and analysis of the human genome.** *Nature* 2001, **409**(6822):860-921.

21. Ferris P, Olson BJ, De Hoff PL, Douglass S, Casero D, Prochnik S, Geng S, Rai R, Grimwood J, Schmutz J *et al*: **Evolution of an expanded sex-determining locus in *Volvox***. *Science* 2010, **328**(5976):351-354.
22. Kjeldgaard M, Nyborg J: **Refined structure of elongation factor EF-Tu from *Escherichia coli***. *J Mol Biol* 1992, **223**(3):721-742.
23. Nissen P, Kjeldgaard M, Thirup S, Polekhina G, Reshetnikova L, Clark BF, Nyborg J: **Crystal structure of the ternary complex of Phe-tRNA<sup>Phe</sup>, EF-Tu, and a GTP analog**. *Science* 1995, **270**(5241):1464-1472.
24. Vogeley L, Palm GJ, Mesters JR, Hilgenfeld R: **Conformational change of elongation factor Tu (EF-Tu) induced by antibiotic binding. Crystal structure of the complex between EF-Tu.GDP and aurodox**. *J Biol Chem* 2001, **276**(20):17149-17155.
25. Horner DS, Foster PG, Embley TM: **Iron hydrogenases and the evolution of anaerobic eukaryotes**. *Mol Biol Evol* 2000, **17**(11):1695-1709.
26. Shimizu T, Inoue T, Shiraishi H: **Cloning and characterization of novel extensin-like cDNAs that are expressed during late somatic cell phase in the green alga *Volvox carteri***. *Gene* 2002, **284**(1-2):179-187.
27. Heitzer M, Hallmann A: **An extracellular matrix-localized metalloproteinase with an exceptional QEXXH metal binding site prefers copper for catalytic activity**. *J Biol Chem* 2002, **277**(31):28280-28286.
28. Hallmann A, Amon P, Godl K, Heitzer M, Sumper M: **Transcriptional activation by the sexual pheromone and wounding: a new gene family from *Volvox* encoding modular proteins with (hydroxy)proline-rich and metalloproteinase homology domains**. *Plant J* 2001, **26**(6):583-593.
29. Ding J, Hayashi MK, Zhang Y, Manche L, Krainer AR, Xu RM: **Crystal structure of the two-RRM domain of hnRNP A1 (UP1) complexed with single-stranded telomeric DNA**. *Genes Dev* 1999, **13**(9):1102-1115.
30. Zhao Y, Ke H: **Crystal structure implies that cyclophilin predominantly catalyzes the trans to cis isomerization**. *Biochemistry* 1996, **35**(23):7356-7361.
31. Philbrick JB, Zilinskas BA: **Cloning, nucleotide sequence and mutational analysis of the gene encoding the Photosystem II manganese-stabilizing polypeptide of *Synechocystis* 6803**. *Mol Gen Genet* 1988, **212**(3):418-425.
32. Loll B, Kern J, Saenger W, Zouni A, Biesiadka J: **Towards complete cofactor arrangement in the 3.0 Å resolution structure of photosystem II**. *Nature* 2005, **438**(7070):1040-1044.
